# Supplementary material
Source: PubMed Central journal article supplement (PMC7023915)
Supplement: NIHMS1556024-supplement-Figure__Supplemental_Digital_Content_2.pdf [file NIHMS1556024-supplement-Figure__Supplemental_Digital_Content_2.pdf]

# Supplemental Digital Content 2: Figure

## Timelines of study protocol for enrolled subjects.

**A)** Timeline for when consent was obtained before oseltamivir dose #1 was administered and **B)** Timeline for when consent was obtained after dose #1 was given. **C)** Specific PK samples collected for all subjects. Sampling timeline **a** was used for both influenza seasons when consent was obtained before dose #1. Sampling timeline **b** was used for the first influenza season when consent was obtained after dose #1. Sampling timelines **c**, **d** and **e** were used for the second influenza season when consent was obtained after dose #1. For patients who remained in the PICU on day 4, PK samples were obtained after dose #7. Subject 7 had a protocol deviation and PK samples were obtained after dose #8 (**c\***). PK samples were obtained pre-dose and at approximately 1 hour ( $\pm 15$  min.), 2.5 hours ( $\pm 30$  min.), 6 hours ( $\pm 1$  hour) and 11 hours ( $\pm 1$  hour) after administration

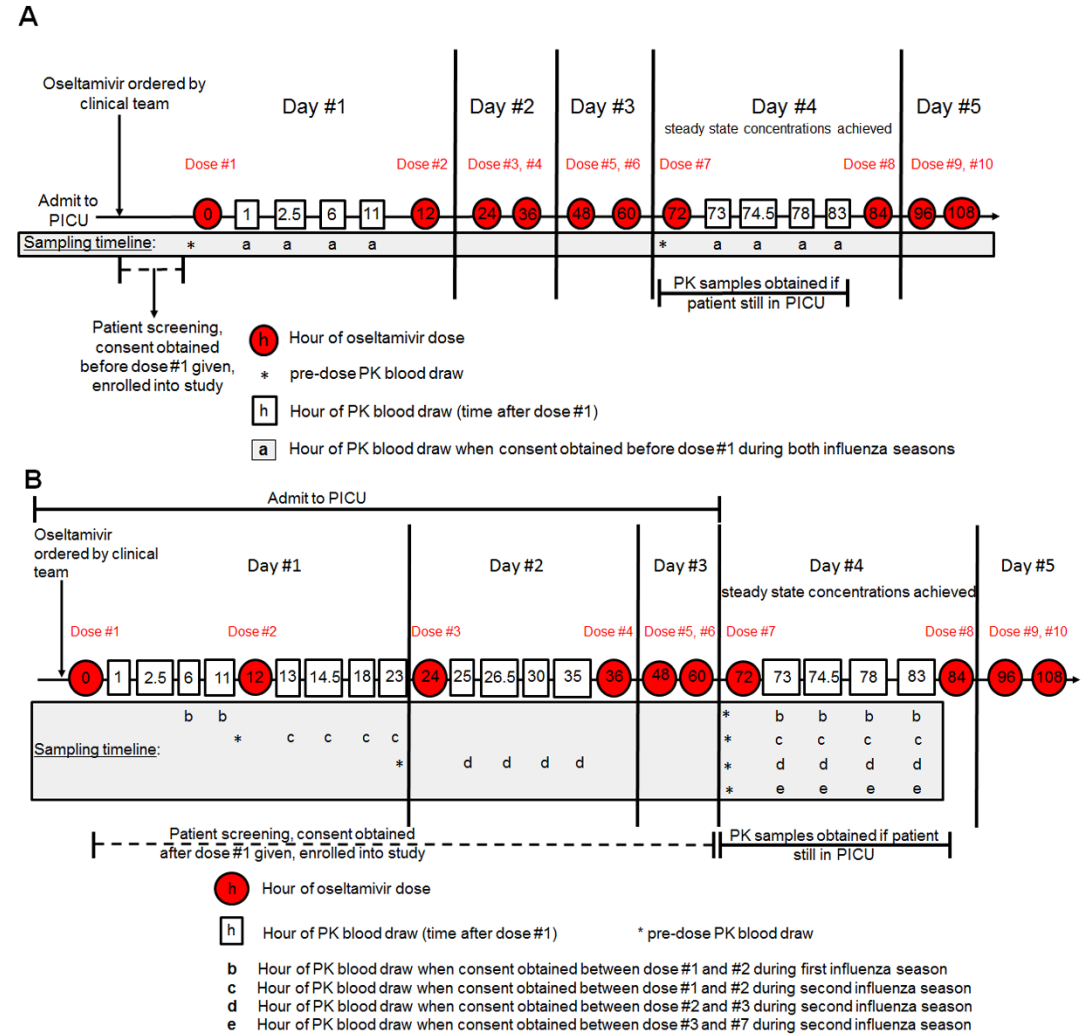

**C)** Specific PK samples collected for all subjects.

| Subject | Dose 1 |   |     |   |    | Dose 2 or 3 |   |     |   |    | Dose 7 or 8 |    |     |    |    |
|---------|--------|---|-----|---|----|-------------|---|-----|---|----|-------------|----|-----|----|----|
|         | pre    | 1 | 2.5 | 6 | 11 | pre         | 1 | 2.5 | 6 | 11 | pre         | 1  | 2.5 | 6  | 11 |
| 1       |        |   |     | b | b  |             |   |     |   |    |             |    |     |    |    |
| 2       | a      | a | a   | a | a  |             |   |     |   |    |             |    |     |    |    |
| 3       |        |   |     |   | b  |             |   |     |   |    |             |    |     |    |    |
| 4       |        |   |     |   | b  |             |   |     |   |    |             |    |     |    |    |
| 5       | a      | a | a   | a | a  |             |   |     |   |    |             |    |     |    |    |
| 6       | a      | a | a   | a | a  |             |   |     |   |    | a           | a  | a   | a  | a  |
| 7       |        |   |     |   |    |             |   |     |   |    | c*          | c* | c*  | c* | c* |
| 8       | a      | a | a   | a | a  |             |   |     |   |    | a           | a  | a   | a  | a  |
| 9       |        |   |     |   |    |             |   |     |   |    | e           | e  | e   | e  | e  |
| 10      |        |   |     |   |    | d           | d | d   | d | d  |             |    |     |    |    |
| 11      |        |   |     |   |    | c           | c | c   | c | c  |             |    |     |    |    |

*c\** deviation from protocol, PK samples obtained after dose #8 instead of dose #7
