# Supplementary material
Source: PubMed Central journal article supplement (PMC7023915)

# Supplemental Digital Content 3: Figure

**Flow diagram of study participants. A)** Enrollment during first influenza season (January 2015-June 2015) and **B)** Enrollment during second influenza season (January 2015-March 2016).

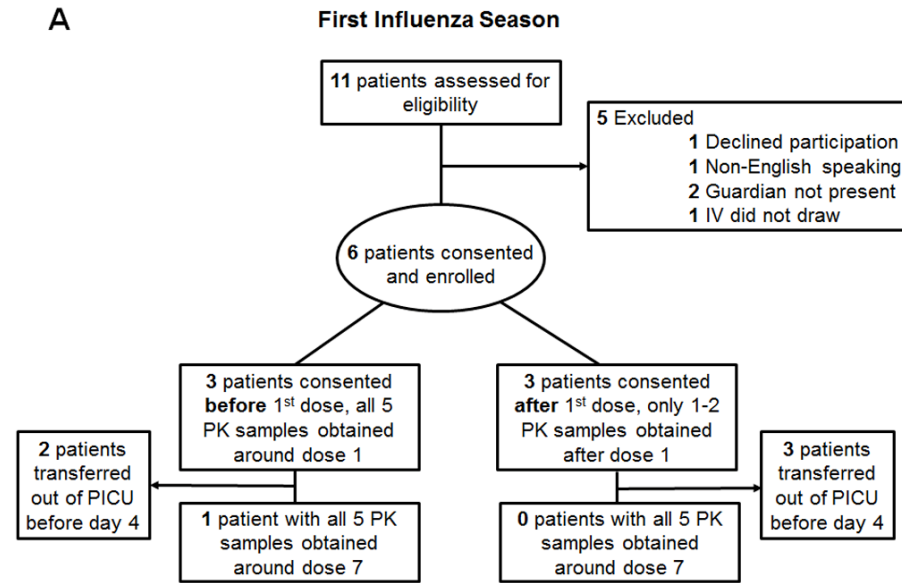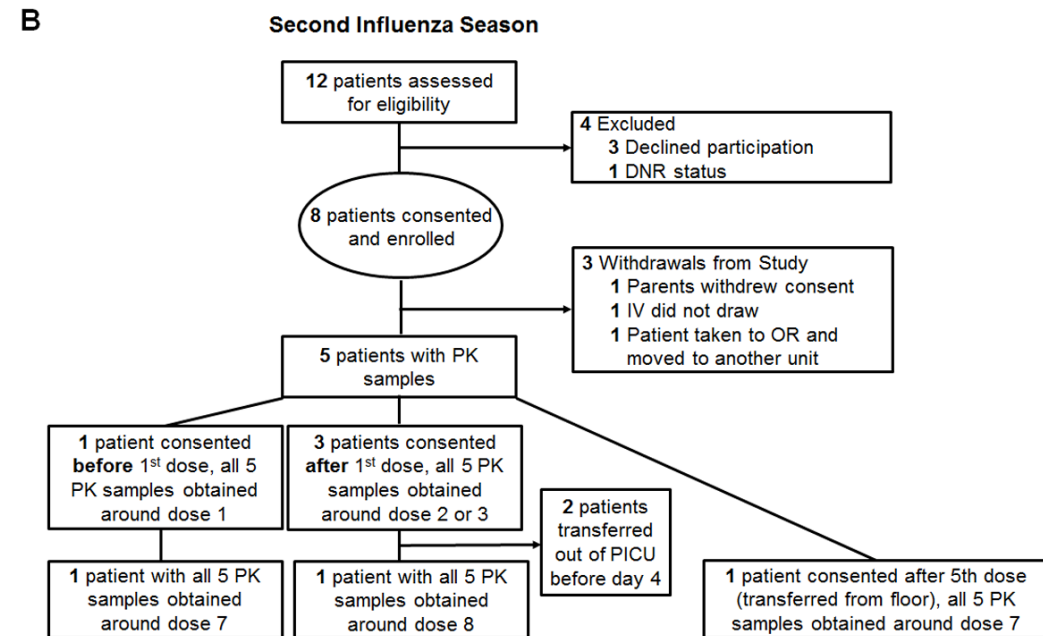

Supplement: NIHMS1556024-supplement-Figure__Supplemental_Digital_Content_3.pdf [file NIHMS1556024-supplement-Figure__Supplemental_Digital_Content_3.pdf]
