# Supplementary material
Source: PubMed Central journal article supplement (PMC7023915)
Supplement: NIHMS1556024-supplement-Table__Supplemental_Digital_Content_4.pdf [file NIHMS1556024-supplement-Table__Supplemental_Digital_Content_4.pdf]

## Supplemental Digital Content 4: Table

**Table 1: Demographics and clinical characteristics of the patients in the oral administration and enteric tube administration group.** IQR=interquartile range, SD = standard deviation, d = day, hr = hour, PRISM: pediatric risk of mortality score, PELOD = pediatric logistic organ dysfunction, LOS=length of stay, PPV = positive pressure ventilation, including continuous positive airway pressure and bilevel positive airway pressure; p-value calculation methods: <sup>a</sup>by Mann-Whitney Rank Sum Test, <sup>b</sup>by Fisher Exact Test, <sup>c</sup>by t-Test

| <b>Cohort Characteristics</b>               | <b>Oral<br/>(n= 4)</b> | <b>Tube<br/>(n=7)</b> | <b>p-value</b>            |
|---------------------------------------------|------------------------|-----------------------|---------------------------|
| First IRB protocol, n (%)                   | 2 (50)                 | 4 (57)                |                           |
| Age (yr), median (IQR)                      | 6.5 (5.3-10)           | 8 (2-15)              | p=0.65 <sup>a</sup>       |
| Males, n (%)                                | 2 (50)                 | 3 (43)                | p=1 <sup>b</sup>          |
| Weight (kg), median (IQR)                   | 22.5 (16.3-55)         | 22 (10-47)            | p=0.79 <sup>a</sup>       |
| Co-Morbid chronic conditions, n (%)         | 2 (50)                 | 5 (71)                | p=0.58 <sup>b</sup>       |
| Tested positive for flu, (%)                | 2 (50)                 | 5 (71)                | p=0.58 <sup>b</sup>       |
| 12-hour PRISM III score, median (IQR)       | 0 (0-4.5)              | 6 (0-8)               | p=0.41 <sup>a</sup>       |
| 24-hour PELOD score, mean ± SD              | 14.3 ± 10              | 13.3 ± 3.5            | p=0.82 <sup>c</sup>       |
| PICU LOS (d), median (IQR)                  | 1.5 (0.63-4.3)         | 7 (1-39)              | p=0.16 <sup>a</sup>       |
| Hospital LOS (d), median (IQR)              | 4.5 (2.3-6.8)          | 13 (6-51)             | p=0.07 <sup>a</sup>       |
| PPV, n (%)                                  | 1 (25)                 | 6 (86)                | p=0.09 <sup>b</sup>       |
| Supplemental oxygen time (hr), median (IQR) | 33 (6.5-105)           | 190 (92-1524)         | <b>p=0.04<sup>a</sup></b> |
| Mechanical Ventilation (d), median (IQR)    | 0 (0-0)                | 5 (0-30)              | p=0.07 <sup>a</sup>       |
